# Supplementary material
Source: publisher site journal article supplement (https://www.dovepress.com/get_supplementary_file.php?f=314959.docx)
Supplement: Supplementary file 1 [file get_supplementary_file.php]

**SUPPLEMENTARY**

**Supplementary Table 1.** Relevant agencies and authorities related to the Nordic health care systems

| Authority/agency | Example of tasks |
| --- | --- |
| Denmark |  |
| The Danish Health Authority | Advises the Ministry of Health, regions, and municipalities, responsible for health planning and promotion and ensures uniform health care services |
| The Danish Medicines Agency | Oversees pharmacies and pharmaceutical companies, licenses new drugs, monitors adverse effects, and authorizes clinical trials |
| Statens Serum Institute | Responsible for prevention, surveillance, and control of infectious diseases, biological threats, and congenital diseases |
| The Danish Patient Safety Authority | Protects patient rights and safety, inspects health institutions and professionals, monitors adverse events |
| The Danish Health Data Authority | Generates coherent health data for administrative and research purposes, maintains a wide range of registries, provides a platform for storage and data analysis |
| The Danish Council on Ethics | Advises public authorities on ethical issues related to genetic engineering and biotechnology |
|  |  |
| The National Committee on Health Research Ethics | Ensures that health research is carried out in an ethically responsible manner, protects the rights and safety of trial subjects |
|  |  |
| Sweden |  |
|  |  |
| The Swedish National Board of Health and Welfare | Develops national guidelines, maintains health registers and official statistics, and supervises health care personnel |
|  |  |
| The Medical Responsibility Board | Handles patient complaints or malpractice |
|  |  |
| The Swedish Council on Technology Assessment in Health Care | Promotes the use of cost-effective health care technologies |
|  |  |
| The Swedish Medical Products Agency | Regulates and monitors the development and sale of drugs and other medicinal products |
|  |  |
| The Dental and Pharmaceutical Benefits Agency | Decides if a medicine or dental service should be subsidized |
|  |  |
| The Swedish Agency for Health and Care Services Analysis | Analyzes and evaluates implemented measures |
|  |  |
| The Swedish eHealth Agency | Promotes information-sharing among health and social care professionals, stores and transfers electronic prescriptions, provides statistics on drugs and pharmaceutical sales |
|  |  |
| The Public Health Agency of Sweden | Gathers and provides evidence-based health knowledge to public institutions and leads national infection control |
|  |  |
| Norway |  |
|  |  |
| The Norwegian Directorate of Health | Implements national health policy, provides national guidelines, and advises authorities and public health institutions |
|  |  |
| The Norwegian Directorate of eHealth | Responsible for digitization of the health care sector |
|  |  |
| The Norwegian Board of Health Supervision | Provides supervision of and monitors need for health and social services |
|  |  |
| The Norwegian Institute of Public Health | Provides monitoring, expertise and research in the areas of epidemiology and infectious disease control |
| The Norwegian Medicines Agency | In charge of granting marketing authorizations, classification, vigilance, pricing, reimbursement, and providing information on medicines |
| The Norwegian Healthcare Investigation Board | Investigates adverse events |
| The Norwegian System of Patient Injury Compensation | Handles compensation claims for patients. Collects injury case data to provide a statistical basis for the health sector's quality improvement |
| Finland |  |
| The Finnish Institute for Health and Welfare | Studies, monitors, and promotes health, and provides expertise to the government, municipalities, other public institutions, and the public |
| The Regional State Administrative Agencies | Guides and monitors municipal and private health care services, evaluates the availability and quality of services, grant licenses to private providers |
|  |  |
| The Finnish Medicines Agency | Regulates medicines, medical devices, blood and tissue products, and biobanks and develops and supervises the pharmaceutical sector |
|  |  |
| The National Supervisory Authority for Welfare and Health | Guides, monitors, and manages the administration of licenses for the healthcare sector, alcohol administration, and environmental health and protection |
|  |  |
| The Institute of Occupational Health | Focuses on well-being at work, research, advisory services and training |
|  |  |
|  |  |
| Iceland |  |
| The Directorate of Health | Advises and supervises on matters concerning health, sponsors and organizes public health initiatives, monitors prescription medicines, collects and processes data on health and health care services, handles complaints |
| Icelandic Health Insurance | Negotiates, purchases, and pays for health care services from both public and independent providers |
| The Icelandic Medicines Agency | Assesses the quality and safety of medicinal products, inspects whether regulatory requirements are fulfilled, provides information to health professionals and the public and ensures consumer protection, decides on the registration and deregistration of pharmaceuticals |
| The Medicine Pricing and Reimbursement Committee | Makes decisions on wholesale pricing, reimbursements, specialty care high-cost medicines among others |

**Supplementary Table 2.** Selected examples of fees in the Nordic healthcare systems 2020/2021

| Sweden | Norway | Finland | Iceland |
| --- | --- | --- | --- |
| Maximum cost for outpatient fees  is ~1100 SEK/year (130 USD/year) | Maximum cost for patient fees is ~2460 NOK/year  (290 USD/year) | Maximum cost for patient fees is ~680 Euro/year (822 USD/year) | Maximum cost for patient fees is ~26,500 ISK/year (200 USD/year);  for pensioners, people with disability, and children, the maximum is ~17,500 ISK/year  (135 USD/year) |
| GP visit ~50-300 SEK  (6-35 USD) | GP visit ~160 NOK  (19 USD); additional fees for blood samples or examinations at GPs | GP visit up to ~20 Euro (24 USD) | GP visit ~700-4500 ISK depending on whether during/after office hours  (5-34 USD) |
| Outpatient visit ~300-400 SEK  (35-47 USD) | Outpatient visits ~375 NOK  (44 USD); additional fees for examinations (eg, x-rays, ultrasound, laboratory tests) | Outpatient visits  up to ~42 Euro  (50 USD) | Outpatient visits ~3500 ISK (26 USD) |
| Inpatient hospital stay maximum 100 SEK/day (12 USD/day);  emergency room visit ~200-400 SEK (24-47 USD) | Inpatient hospital visits and treatment are free | Inpatient hospital stay up to ~50 Euro (~60 USD/day);  emergency room visit up to ~28 Euro (33 USD) | Inpatient hospital stays are free;  emergency room visit ~7000 ISK (52 USD) |
| No fees for children, individuals with a disease that is regulated by the Infectious Diseases Act 2004:168, and outpatient visits for elderly ≥85 years;  healthcare related to contraceptive advice, mammography, and cervical cancer screening is free of charge; maternal pregnancy care and syringe exchange programs (for drug abusers) are free of charge | No fees for pregnant women and children < 16 years of age | No fees for children < 18 years and patients with respiratory paralysis; visits to maternal and child welfare centers, public health nurses, laboratory tests and X-rays, visits related to contagious infectious diseases, and organ transplants are free of charge | GP visits are free for children and elderly; outpatient visits are free for children |

**Supplementary Table 3.** Timeline for use of the International Classification of Diseases (ICD) coding systems in the causes of death registries of each country

|  | ICD-6 | ICD-7 | ICD-8 | ICD-9 | ICD-10 |
| --- | --- | --- | --- | --- | --- |
| Denmark | NA | NA | 1970-1993 | NA | 1994- |
| Sweden | 1952-1957 | 1958-1968 | 1969-1986 | 1987-1996 | 1997- |
| Norway | 1951-1957 | 1958-1968 | 1969-1985 | 1986-1995 | 1996- |
| Finland | 1952-1953 | 1954-1968 | 1969-1986 | 1987-1995 | 1996- |
| Iceland | 1951-1970 | NA | 1971-1980 | 1981-1995 | 1996- |

**Source:** Health Classifications in the Nordic Countries (2006). Björn Smedby and Gunnar Schiøler. Responsible organization: Nordic Council of Ministers, NOMESCO-NOSOSCO. (http://norden.diva-portal.org/smash/get/diva2:970544/FULLTEXT01.pdf)
